# Supplementary material for: Assessing the Knowledge, Attitudes and Behaviors of Human and Animal Health Students towards Antibiotic Use and Resistance: A Pilot Cross-Sectional Study in the UK
Source: Antibiotics (Basel). 2018 Jan 30;7(1):10. doi: 10.3390/antibiotics7010010 (PMC5872121; doi:10.3390/antibiotics7010010)
Supplement: Supplementary file 1 [file antibiotics-07-00010-s001.zip]

Archive with 5 entries (4 files):
- Document S2.pdf
- __MACOSX/
- __MACOSX/._Document S2.pdf
- Document S1.docx
- __MACOSX/._Document S1.docx
